# Supplementary material for: Sodium ion storage properties of WS2-decorated three-dimensional reduced graphene oxide microspheres
Source: Royal Society of Chemistry journal article supplement (doi:10.1039/c4nr06880g), 2015-01-01
Supplement: c4nr06880g1.pdf [file c4nr06880g1.pdf]

## **Supporting Information**

### **Sodium Ion Storage Properties of WS<sub>2</sub>-Decorated Three-Dimensional Reduced Graphene Oxide Microspheres**

Seung Ho Choi and Yun Chan Kang\*

Department of Materials Science and Engineering, Korea University, Anam-Dong,  
Seongbuk-Gu, Seoul 136-713, Republic of Korea.

\*Corresponding author. Fax: (+82) 2-928-3584.

E-mail address: yckang@korea.ac.kr

## Experimental Section

*Synthesis method.* Graphene oxide (GO) was synthesized using a modified Hummer's method. The as-obtained GO was redispersed in distilled water and exfoliated by ultrasonication to generate GO sheets, and 500 mL of the exfoliated GO solution ( $1 \text{ mg ml}^{-1}$ ) was added to 1.5 g of ammonium tungstate hydrate. Then, 3.0 g of 100 nm-sized PS nanobeads was added to the solution of GO sheets and W salt. The resulting solution was dispersed in distilled water by ultrasonication.  $\text{WO}_3$ -3D RGO microspheres were directly prepared by ultrasonic spray pyrolysis at  $800^\circ\text{C}$ . A quartz reactor of length 1200 mm and diameter 50 mm was used, with a nitrogen flow rate (carrier gas) of  $5 \text{ L min}^{-1}$ . The  $\text{WO}_3$ -3D RGO microspheres were sulfidated at  $400^\circ\text{C}$  for 12 h in the presence of 10%  $\text{H}_2/\text{Ar}$  mixture gas with thiourea as a sulfur source. An alumina boat containing the  $\text{WO}_3$ -3D RGO microspheres powders was loaded into a larger alumina boat with a cover. A thiourea powder was loaded on the outside of the small alumina boat for complete sulfidation of the  $\text{WO}_3$ -3D RGO microspheres. Decomposition of the melted thiourea under hydrogen/argon mixture gas supplied as the carrier gas produced hydrogen sulfide gas. Finally, the  $\text{WS}_2$ -3D RGO microspheres were produced by sulfidation of the  $\text{WO}_3$ -3D RGO microspheres thanks to the hydrogen sulfide gas continuously generated by thiourea. The 3D RGO,  $\text{WO}_3$ ,  $\text{WS}_2$ , and  $\text{WS}_2$ -RGO microspheres were also prepared for comparison. The bare  $\text{WO}_3$  and  $\text{WO}_3$ -RGO powders were directly prepared by spray pyrolysis from the spray solutions with and without GO sheets, respectively. The bare  $\text{WS}_2$  and  $\text{WS}_2$ -RGO powders were obtained by sulfidation process of bare  $\text{WO}_3$  and  $\text{WO}_3$ -RGO powders, respectively. The 3D RGO microspheres were directly prepared by spray pyrolysis from the spray solution with GO sheets and PS nanobeads.

*Characterizations.* The crystal structures of the microspheres were investigated by X-ray diffractometry (XRD, X'pert PRO MPD), using Cu K $\alpha$  radiation ( $\lambda = 1.5418 \text{ \AA}$ ). Morphological features were investigated using field-emission scanning electron microscopy (FE-SEM, Hitachi S-4800) and high-resolution transmission electron microscopy (HR-TEM, JEM-2100F) at a working voltage of 200 kV. The specific surface areas of the microspheres were calculated from a Brunauer–Emmett–Teller (BET) analysis of nitrogen adsorption measurements (TriStar 3000). The microspheres were also investigated using X-ray photoelectron spectroscopy (XPS, ESCALAB-210) with Al K $\alpha$  radiation (1486.6 eV). Thermal gravimetric analysis (TGA, SDT Q600) was performed in air at a heating rate of  $10^\circ\text{C min}^{-1}$  to determine the amount of carbon in the microspheres.

*Electrochemical measurements.* The capacities and cycling properties of the WS<sub>2</sub>-3D RGO and WO<sub>3</sub>-3D RGO microspheres were determined using 2032-type coin cells. The electrodes were prepared from a mixture containing 70 wt% active material, 20 wt% Super P, and 10 wt% sodium carboxymethyl cellulose (Na-CMC) binder. Sodium metal and microporous polypropylene film were used as a counter electrode and separator, respectively. The electrolyte was a solution of 1 M NaClO<sub>4</sub> (Aldrich) in a 1:1 volume mixture of ethylene carbonate/dimethyl carbonate (EC/DMC) to which 5 wt% fluoroethylene carbonate was added. The charge-discharge characteristics of the samples were determined by cycling in the potential range 0.001–3.0 V at fixed current densities. Cyclic voltammetry (CV) was carried out at a scan rate of  $0.1 \text{ mV s}^{-1}$ . The dimensions of the negative electrode were  $1 \text{ cm} \times 1 \text{ cm}$  and the mass loading was approximately  $1.4 \text{ mg cm}^{-2}$ . Electrochemical impedance was measured using electrochemical impedance spectroscopy (EIS) over a frequency range of 0.01 Hz–100 kHz.

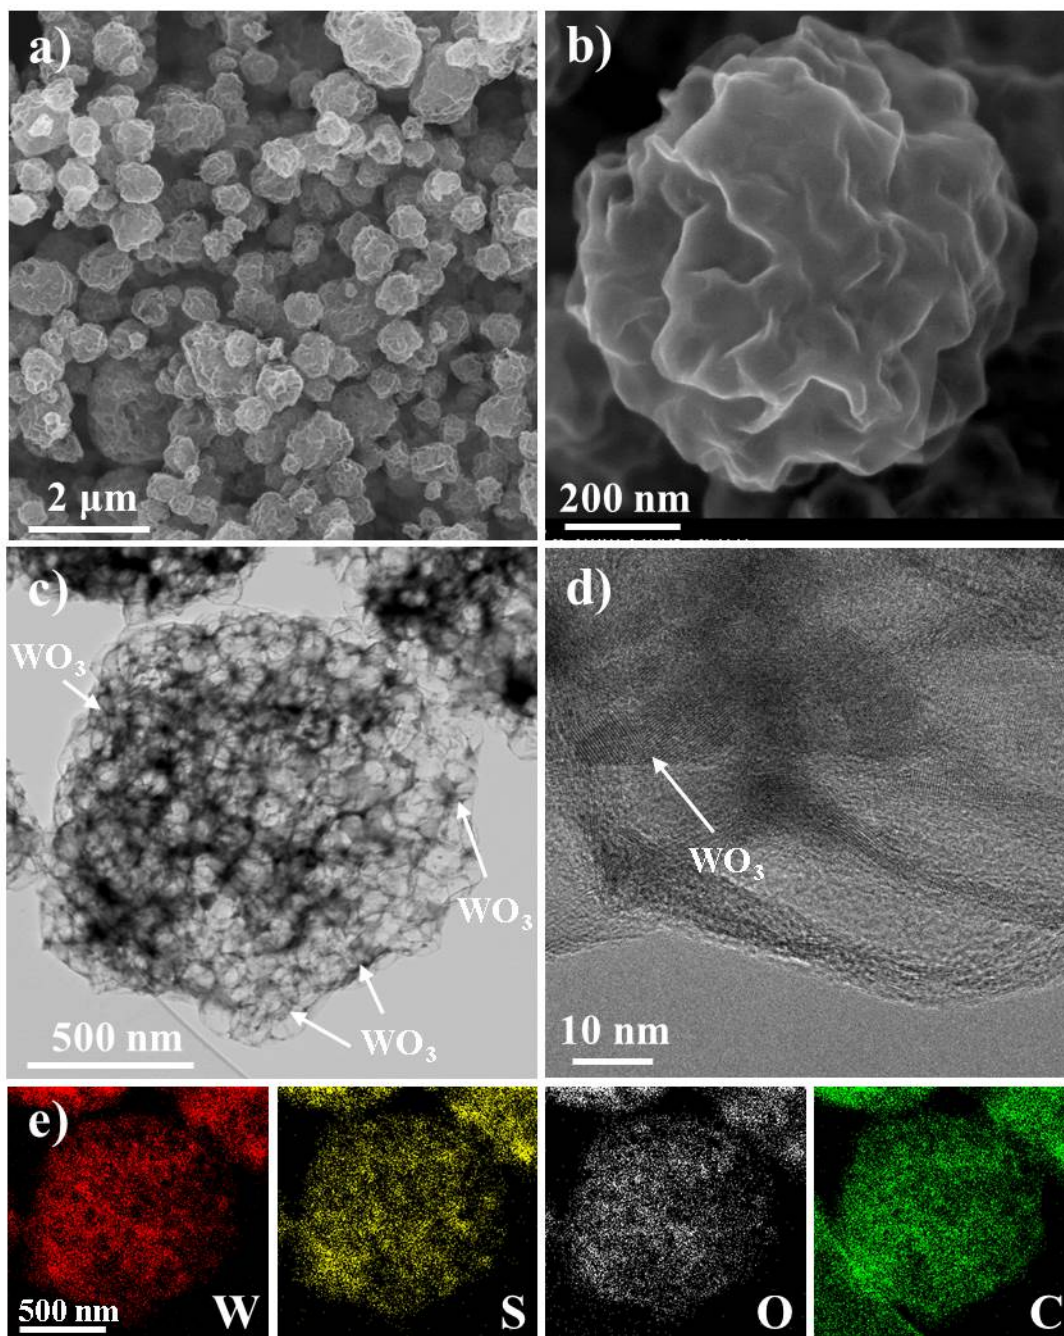

**Fig. S1** Morphologies of the  $\text{WO}_3$ -3D RGO microspheres obtained at a sulfidation temperature of 200°C. a,b) FE-SEM images, c,d) TEM images, and e) elemental mapping images of W, S, O, and C components.

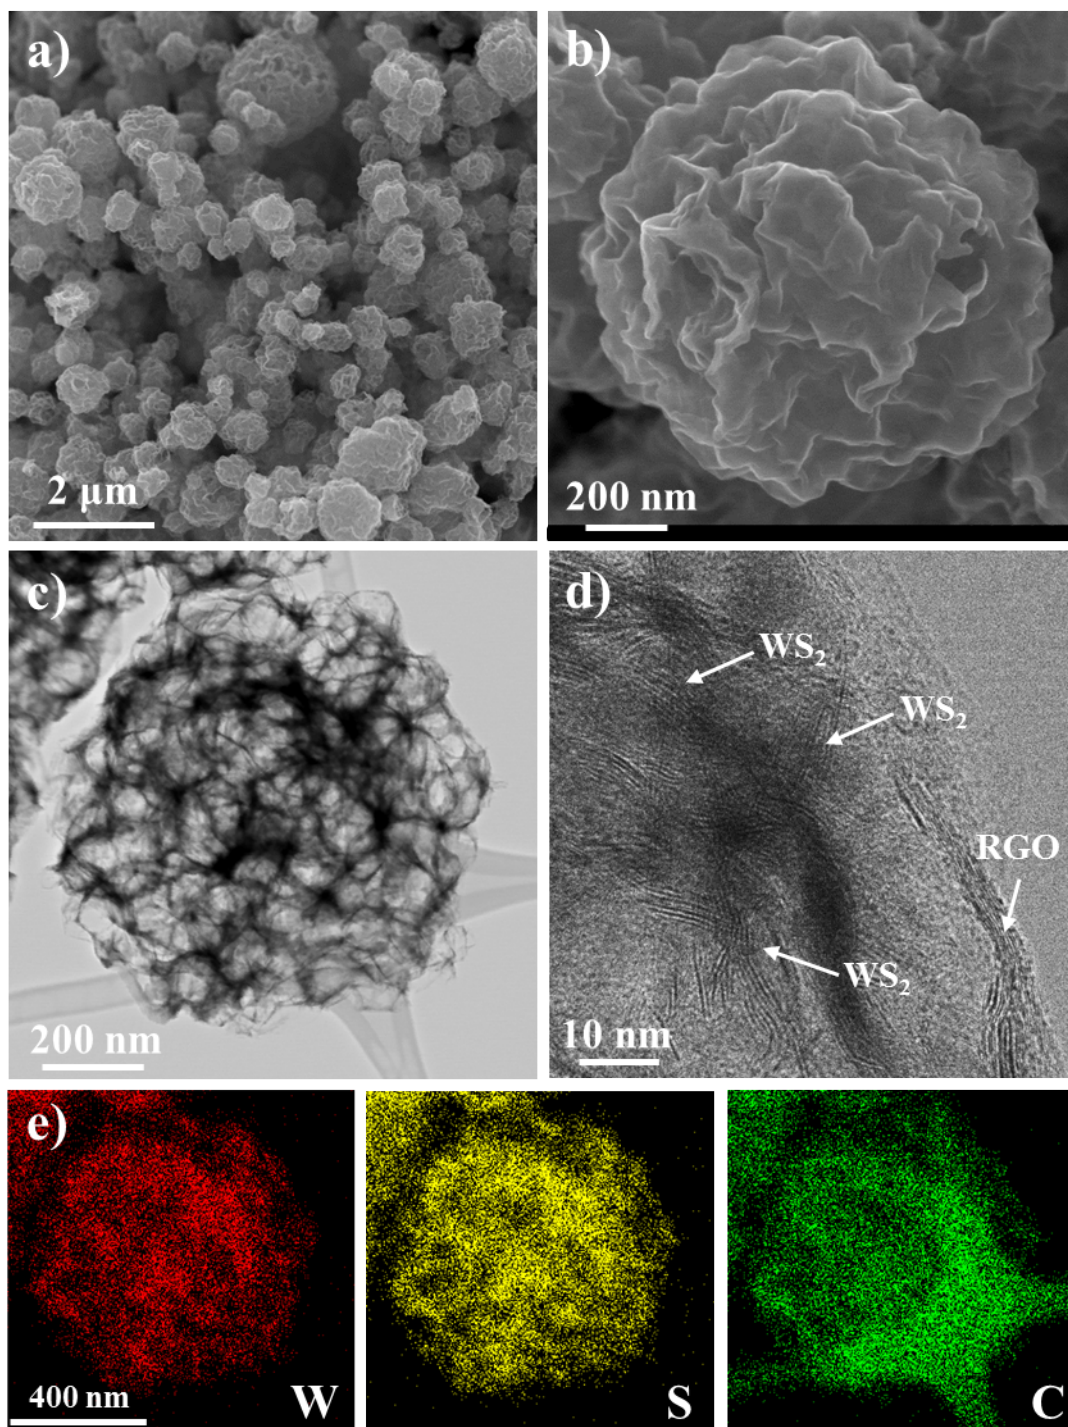

**Fig. S2** Morphologies of the WS<sub>2</sub>-3D RGO microspheres obtained at a sulfidation temperature of 600°C. a,b) FE-SEM images, c,d) TEM images, and e) elemental mapping images of W, S, and C components.

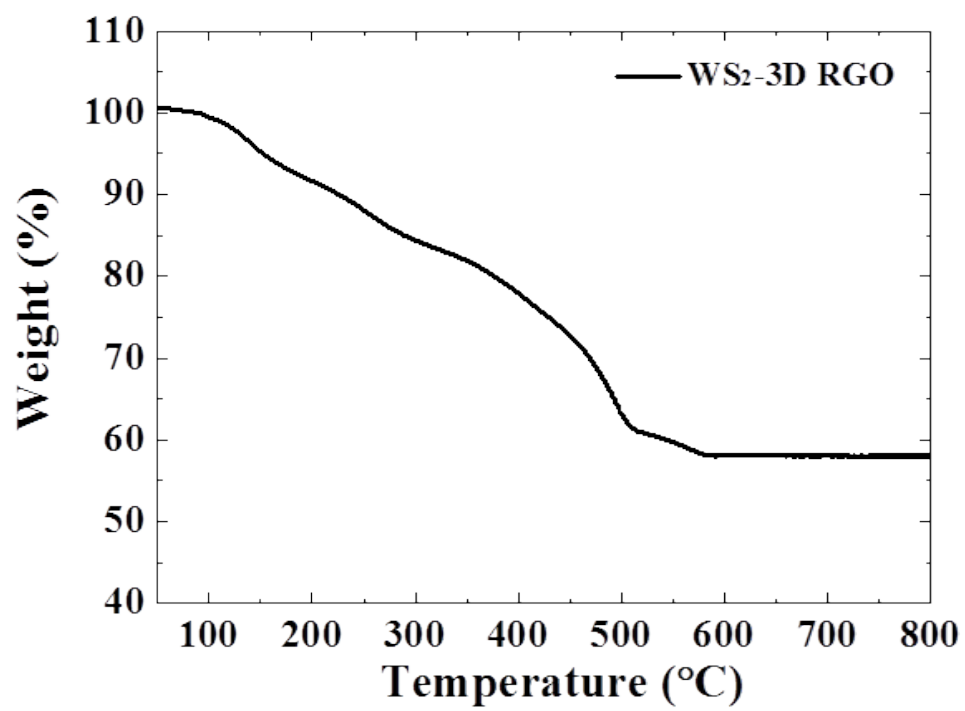

**Fig. S3** TG curve of the WS<sub>2</sub>-3D RGO microspheres.

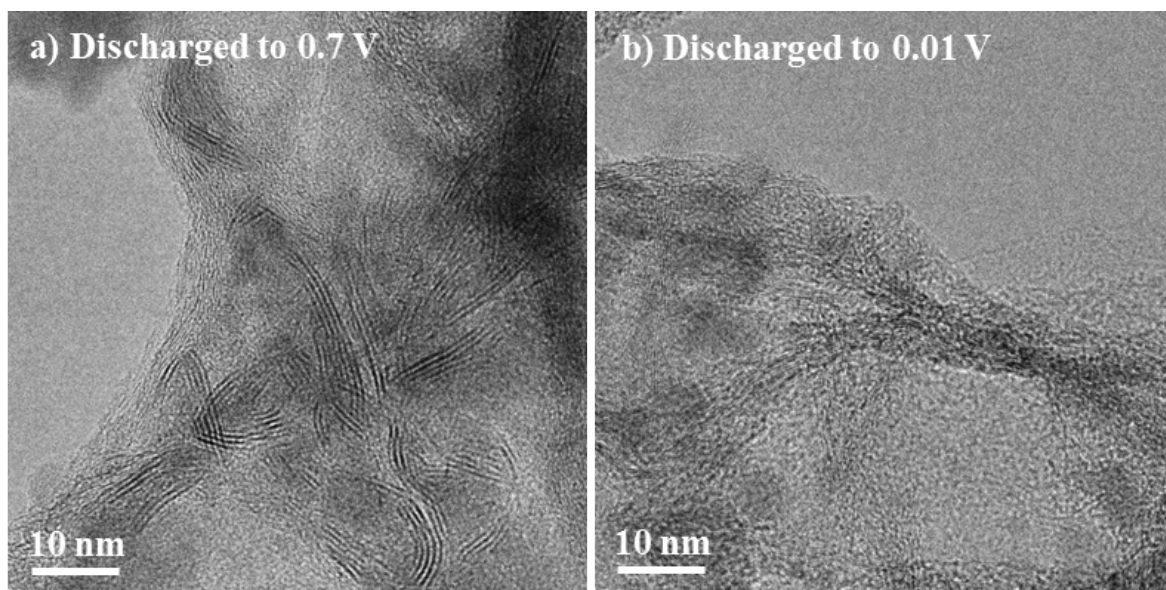

**Fig. S4** High resolution TEM images of the WS<sub>2</sub>-3D RGO microspheres obtained after first discharge process to (a) 0.7 V and (b) 0.01 V.

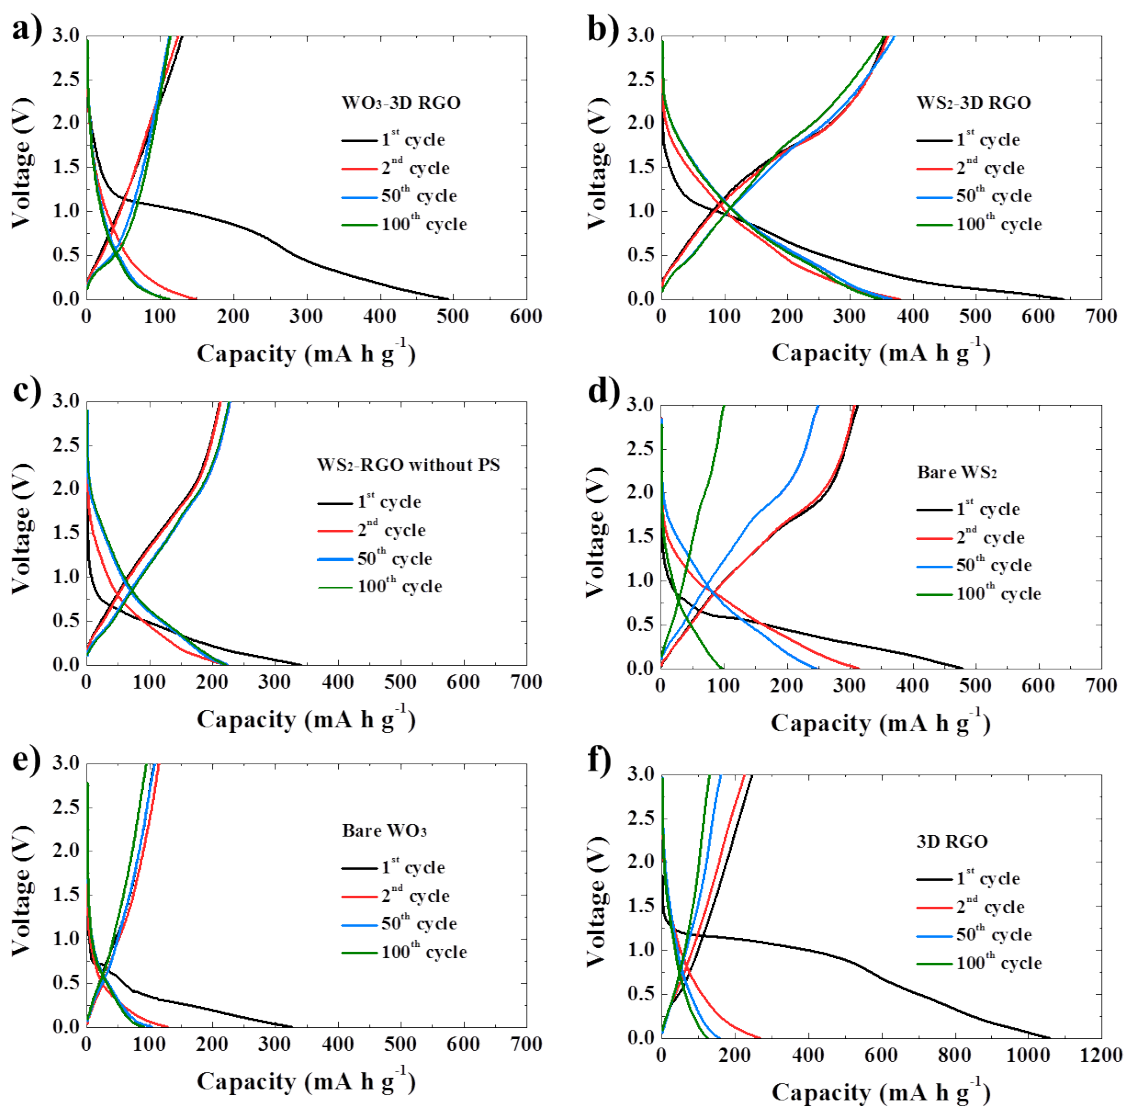

**Fig. S5** Charge and discharge curves of the microspheres at a current density of  $200 \text{ mA g}^{-1}$ . a)  $\text{WO}_3$ -3D RGO, b)  $\text{WS}_2$ -3D RGO, c)  $\text{WS}_2$ -RGO, d) Bare  $\text{WS}_2$ , e) bare  $\text{WO}_3$ , and f) 3D RGO.



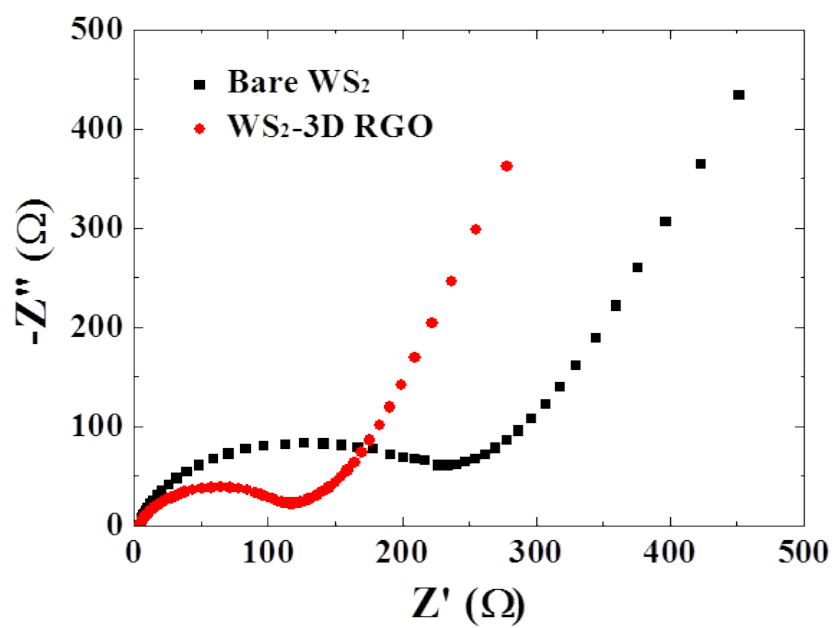

**Fig. S6** Electrochemical impedance spectroscopy (EIS) of the WS<sub>2</sub>-3D RGO and bare WS<sub>2</sub> microspheres.

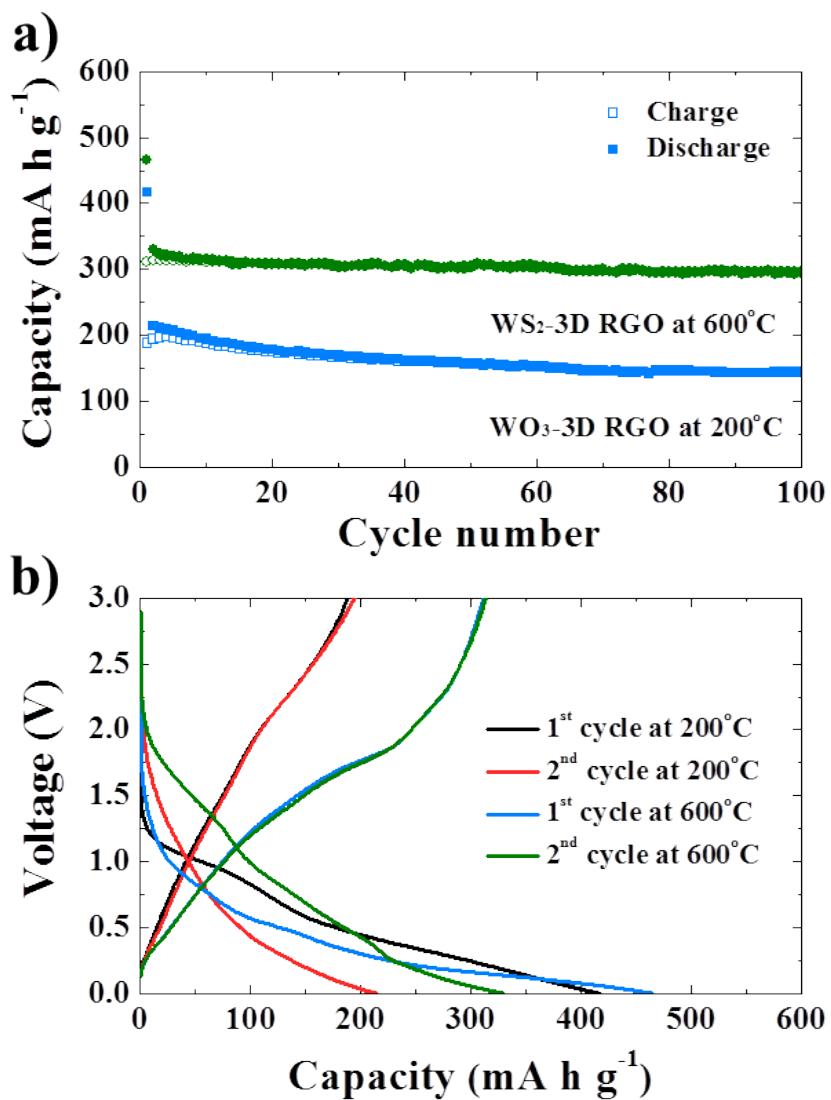

**Fig. S7** Cycling performances and charge/discharge curves of the microspheres obtained at sulfidation temperatures of  $200^\circ\text{C}$  and  $600^\circ\text{C}$ . a) cycling performances and b) first and second cycle curves.

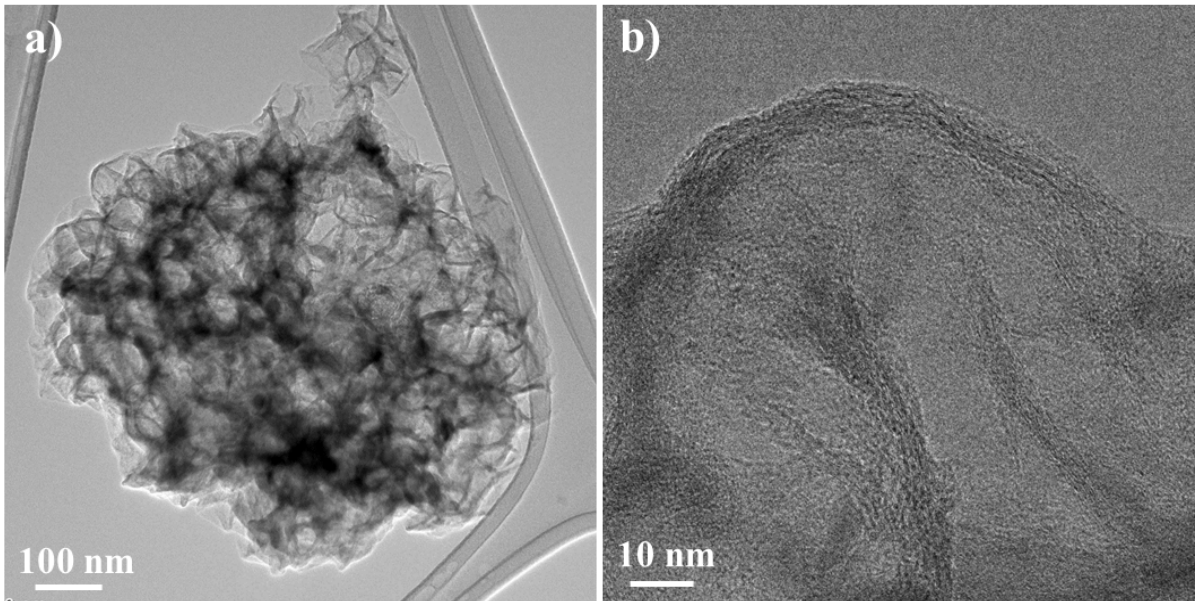

**Fig. S8** TEM images of the WS<sub>2</sub>-3D RGO microsphere obtained after rate performance test.

| Table S1 – Na <sup>+</sup> storage properties of various WS <sub>2</sub> and MoS <sub>2</sub> materials on copper foil. |                                  |                                                                                                                                           |           |
|-------------------------------------------------------------------------------------------------------------------------|----------------------------------|-------------------------------------------------------------------------------------------------------------------------------------------|-----------|
| Typical examples                                                                                                        | Synthesis                        | Electrochemical properties                                                                                                                | Ref       |
| WS <sub>2</sub> @graphene nanocomposites                                                                                | Hydrothermal approach            | 340 mA h g <sup>-1</sup> after 500 cycles at 20 mA g <sup>-1</sup><br>150 mA h g <sup>-1</sup> after 200 cycles at 320 mA g <sup>-1</sup> | [1]       |
| MoS <sub>2</sub> /Graphene Composite Paper                                                                              | Vacuum filtration                | 218 mA h g <sup>-1</sup> after 20 cycles at 25 mA g <sup>-1</sup>                                                                         | [2]       |
| MoS <sub>2</sub> Embedded in Carbon Nanofibers                                                                          | Electrospinning process          | 300 mA h g <sup>-1</sup> after 100 cycles at 1000 mA g <sup>-1</sup>                                                                      | [3]       |
| MoS <sub>2</sub> /Graphene Composites                                                                                   | Hydrothermal method              | 312.7 mA h g <sup>-1</sup> after 200 cycles at 100 mA g <sup>-1</sup>                                                                     | [4]       |
| Vine-like MoS <sub>2</sub> Fiber                                                                                        | Electrospinning process          | 470 mA h g <sup>-1</sup> after 30 cycles at 100 mA g <sup>-1</sup>                                                                        | [5]       |
| MoS <sub>2</sub> /Carbon Composite                                                                                      | Hydrothermal method              | 400 mA h g <sup>-1</sup> after 300 cycles at 670 mA g <sup>-1</sup>                                                                       | [6]       |
| MoS <sub>2</sub> Nanoflowers                                                                                            | Hydrothermal method              | 320 mA h g <sup>-1</sup> after 600 cycles at 200 mA g <sup>-1</sup>                                                                       | [7]       |
| Ultrathin MoS <sub>2</sub> Nanosheets                                                                                   | Ultrasonic exfoliation technique | 251 mA h g <sup>-1</sup> after 100 cycles at 320 mA g <sup>-1</sup>                                                                       | [8]       |
| WS <sub>2</sub> @3D RGO Composite                                                                                       | Spray pyrolysis                  | 334 mA h g <sup>-1</sup> after 200 cycles at 200 mA g <sup>-1</sup><br>and 287 mA h g <sup>-1</sup> at 900 mA g <sup>-1</sup>             | This work |

- [1] D. Su, S. Dou and G. Wang, *Chem. Commun.*, 2014, 50, 4192–4195.
- [2] L. David, R. Bhandavat and G. Singh, *ACS Nano*, 2014, 8, 1759–1770.
- [3] C. Zhu, X. Mu, P. A. van Aken, Y. Yu and J. Maier, *Angew. Chem. Int. Ed.*, 2014, 53, 2152–2156.
- [4] Y. X. Wang, S. L. Chou, D. Wexler, H. K. Liu and S. X. Dou, *Chem. Eur. J.*, 2014, 20, 9607–9612.
- [5] W. H. Ryu, J. W. Jung, K. Park, S. J. Kim and I. D. Kim, *Nanoscale*, 2014, 6, 10975–10981.
- [6] J. Wang, C. Luo, T. Gao, A. Langrock, A. C. Mignerey and C. Wang, *Small*, 2014, DOI: 10.1002/smll.201401521.
- [7] Z. Hu, L. Wang, K. Zhang, J. Wang, F. Cheng, Z. Tao and J. Chen, *Angew. Chem. Int. Ed.*, 2014, 53, 12794–12798.
- [8] D. Su, S. Dou and G. Wang, *Adv. Energy Mater.* 2014, 1401205.
